# Supplementary material for: Interconnected three-dimensional anodized aluminum oxide (3D-AAO) metamaterials using different waveforms and metal layers for RGB display technology applications
Source: Royal Society of Chemistry journal article supplement (doi:10.1039/d1tc05209h), 2022-01-01
Supplement: d1tc05209h1.pdf [file d1tc05209h1.pdf]

## Supporting information

### Interconnected three-dimensional anodized aluminum oxide (3D-AAO) metamaterials using different waveforms and metal layers for RGB display technology applications.

Cristina V. Manzano<sup>1,\*</sup>, Julia Rodríguez-Acevedo<sup>1</sup>, Olga Caballero-Calero<sup>1</sup>,  
Marisol Martín-González<sup>1,\*</sup>

Instituto de Micro y Nanotecnología, IMN-CNM, CSIC (CEI UAM+CSIC) Isaac  
Newton, 8, E-28760, Tres Cantos, Madrid, Spain

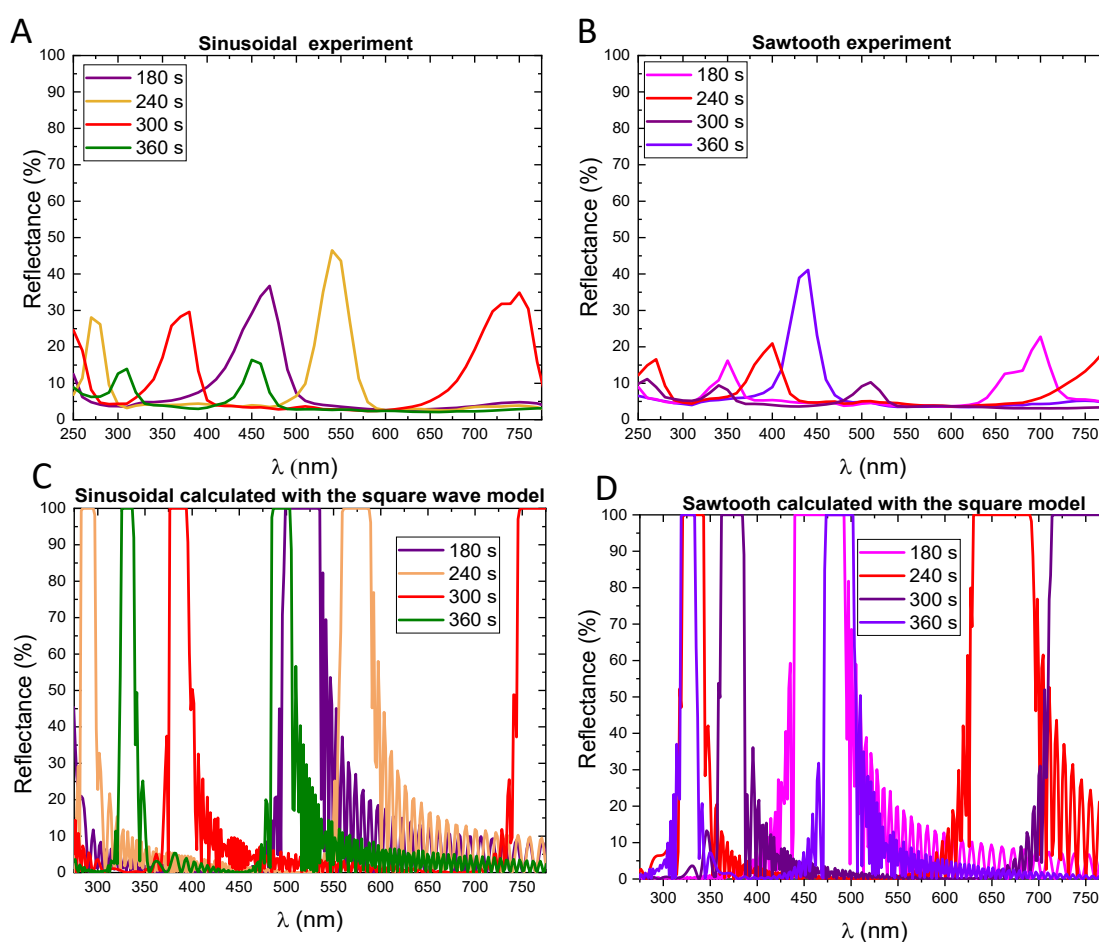

Fig. S1. Comparison between the experimental reflectance spectra collected for the different 3D-AAOs fabricated with different waves and different rest pulses: (a) sinusoidal, and (c) sawtooth, and the theoretical reflectance spectra obtained with the theoretical model of layers depicted in Figure S3 for the square wave, but used for all of them, (b) sinusoidal, and (d) sawtooth. It can be seen that the comparison between (a) and (c) (sinusoidal wave) is quite bad, and between (b) and (d) is very poor.

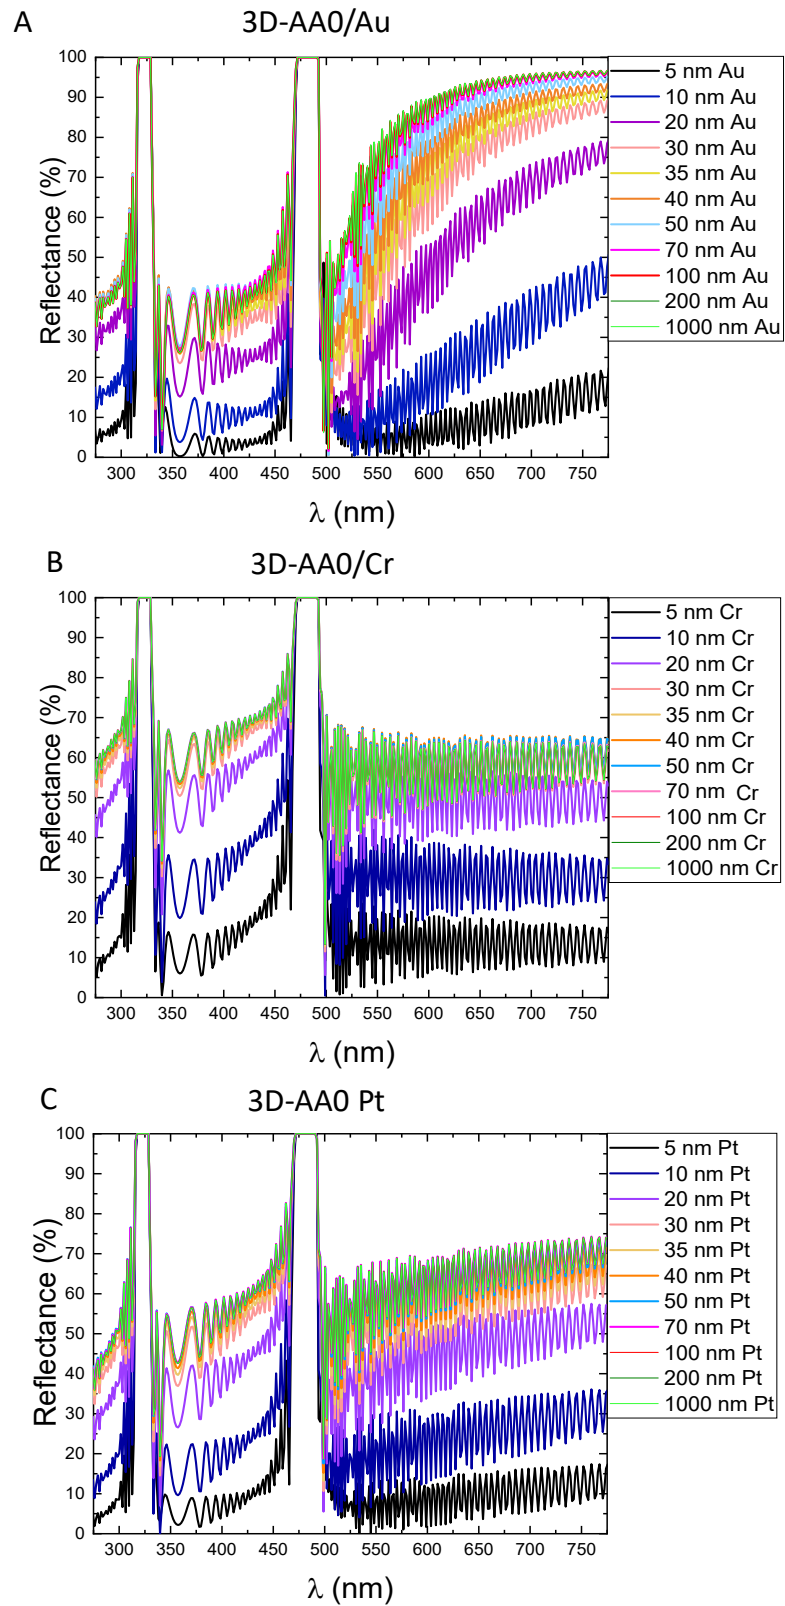

Fig. S2. Simulated reflectance as a function of the wavelength of 3D-AAO/metal nanostructures fabricated with square for different metals thickness: (a) Au, (b) Cr, and (c) Pt.
